# Supplementary material for: In Vitro and In Vivo Pipeline for Validation of Disease-Modifying Effects of Systems Biology-Derived Network Treatments for Traumatic Brain Injury—Lessons Learned
Source: PubMed Central journal article supplement (PMC6861918; doi:10.3390/ijms20215395), 2019-10-29
Supplement: ijms-20-05395-s001.pdf [file ijms-20-05395-s001.pdf]

**In vitro and in vivo pipeline for validation of disease-modifying effects of systems biology-derived network treatments for traumatic brain injury – lessons learned**

Anssi Lipponen, Teemu Natunen, Mika Hujo, Robert Ciszek, Elina Hämäläinen, Jussi Tohka, Mikko Hiltunen, Jussi Paananen, David Poulsen, Emilia Kansanen, Xavier Ekolle Nnode-Ekane, Anna-Liisa Levonen and Asla Pitkänen.

**Table S1.** Effect of test compounds (desmethylclomipramine, ionomycin, sirolimus, trimipramine) and positive controls (1400W, IL-10) on TNF $\alpha$  and nitrite concentrations and neuronal viability in neuron-BV2 microglia co-cultures after 48-h drug treatment.

| Drug                         | TNF $\alpha$  |                                    |                  | Nitrite       |                                  |                  | Neuronal viability |                                      |                  |
|------------------------------|---------------|------------------------------------|------------------|---------------|----------------------------------|------------------|--------------------|--------------------------------------|------------------|
|                              | % of control  | Mean $\pm$ SEM<br>pg/ml            | p-value          | % of control  | Mean $\pm$ SEM<br>$\mu$ M        | p-value          | % of control       | Mean $\pm$ SEM<br>AU                 | p-value          |
| <b>Desmethylclomipramine</b> |               |                                    |                  |               |                                  |                  |                    |                                      |                  |
| 10 $\mu$ M                   | -             | -                                  | -                | -             | -                                | -                | -                  | -                                    | -                |
| 1 $\mu$ M                    | <b>71.7 %</b> | <b>492.1 <math>\pm</math> 32.5</b> | <b>4.451e-5</b>  | <b>85.2 %</b> | <b>72.3 <math>\pm</math> 2.7</b> | <b>0.0005953</b> | 114.2 %            | 0.1793 $\pm$ 0.012                   | 0.08836          |
| 0.1 $\mu$ M                  | <b>74.5 %</b> | <b>511.4 <math>\pm</math> 36.0</b> | <b>0.000825</b>  | <b>86.1 %</b> | <b>73.1 <math>\pm</math> 2.7</b> | <b>0.002643</b>  | 102.6 %            | 0.1611 $\pm$ 0.009                   | 0.6913           |
| 0.01 $\mu$ M                 | 88.4 %        | 607.0 $\pm$ 33.9                   | 0.133            | 96.7 %        | 82.0 $\pm$ 2.9                   | 0.8706           | 93.4 %             | 0.1466 $\pm$ 0.007                   | 0.323            |
| <b>Ionomycin</b>             |               |                                    |                  |               |                                  |                  |                    |                                      |                  |
| 10 $\mu$ M                   | -             | -                                  | -                | -             | -                                | -                | -                  | -                                    | -                |
| 1 $\mu$ M                    | <b>55.8 %</b> | <b>382.8 <math>\pm</math> 12.4</b> | <b>2.71e-6</b>   | <b>79.8 %</b> | <b>67.8 <math>\pm</math> 2.1</b> | <b>6.764e-5</b>  | 123.3 %            | 0.1936 $\pm$ 0.022                   | 0.2126           |
| 0.1 $\mu$ M                  | <b>59.3 %</b> | <b>406.8 <math>\pm</math> 16.9</b> | <b>2.719e-6</b>  | <b>82.0 %</b> | <b>69.6 <math>\pm</math> 1.4</b> | <b>0.001602</b>  | 113.0 %            | 0.1774 $\pm$ 0.015                   | 0.2931           |
| 0.01 $\mu$ M                 | <b>70.9 %</b> | <b>486.5 <math>\pm</math> 29.5</b> | <b>0.0005112</b> | <b>81.7 %</b> | <b>69.4 <math>\pm</math> 2.2</b> | <b>0.0005116</b> | 108.9 %            | 0.1709 $\pm$ 0.010                   | 0.2509           |
| <b>Sirolimus</b>             |               |                                    |                  |               |                                  |                  |                    |                                      |                  |
| 10 $\mu$ M                   | -             | -                                  | -                | -             | -                                | -                | -                  | -                                    | -                |
| 1 $\mu$ M                    | <b>60.7 %</b> | <b>416.4 <math>\pm</math> 26.4</b> | <b>3.263e-5</b>  | <b>63.1 %</b> | <b>53.5 <math>\pm</math> 3.0</b> | <b>1.59e-7</b>   | <b>144.7 %</b>     | <b>0.2272 <math>\pm</math> 0.019</b> | <b>0.0004456</b> |
| 0.1 $\mu$ M                  | <b>61.2 %</b> | <b>420.1 <math>\pm</math> 29.1</b> | <b>5.167e-5</b>  | <b>66.0 %</b> | <b>56.0 <math>\pm</math> 3.1</b> | <b>2.385e-7</b>  | <b>133.4 %</b>     | <b>0.2094 <math>\pm</math> 0.019</b> | <b>0.01123</b>   |
| 0.01 $\mu$ M                 | <b>68.2 %</b> | <b>468.1 <math>\pm</math> 38.4</b> | <b>0.0005112</b> | <b>78.9 %</b> | <b>66.9 <math>\pm</math> 4.3</b> | <b>0.0018</b>    | 110.8 %            | 0.1740 $\pm$ 0.013                   | 0.2338           |
| <b>Trimipramine</b>          |               |                                    |                  |               |                                  |                  |                    |                                      |                  |
| 100 $\mu$ M                  | -             | -                                  | -                | -             | -                                | -                | -                  | -                                    | -                |
| 10 $\mu$ M                   | <b>61.2 %</b> | <b>420.3 <math>\pm</math> 28.3</b> | <b>5.439e-6</b>  | <b>76.9 %</b> | <b>65.2 <math>\pm</math> 2.5</b> | <b>4.695e-5</b>  | 104.2 %            | 0.1636 $\pm$ 0.012                   | 0.6153           |
| 1 $\mu$ M                    | <b>69.9 %</b> | <b>479.5 <math>\pm</math> 24.7</b> | <b>5.167e-6</b>  | <b>83.7 %</b> | <b>71.0 <math>\pm</math> 1.2</b> | <b>0.0007629</b> | 106.3 %            | 0.1668 $\pm$ 0.009                   | 0.3058           |
| 0.1 $\mu$ M                  | <b>77.5 %</b> | <b>532.2 <math>\pm</math> 27.0</b> | <b>0.004601</b>  | <b>88.2 %</b> | <b>74.9 <math>\pm</math> 2.0</b> | <b>0.02164</b>   | 102.7 %            | 0.1612 $\pm$ 0.010                   | 0.8111           |
| <b>1400W</b>                 |               |                                    |                  |               |                                  |                  |                    |                                      |                  |
| 20 $\mu$ M                   | 102.6 %       | 768.1 $\pm$ 45.2                   | 0.9591           | <b>5.7 %</b>  | <b>4.8 <math>\pm</math> 1.1</b>  | <b>1.519e-5</b>  | <b>257.1 %</b>     | <b>0.4036 <math>\pm</math> 0.023</b> | <b>4.445e-5</b>  |
| <b>IL10</b>                  |               |                                    |                  |               |                                  |                  |                    |                                      |                  |
| 50 ng/ml                     | <b>26.9 %</b> | <b>161.2 <math>\pm</math> 26.9</b> | <b>2.179e-6</b>  | <b>68.8 %</b> | <b>68.5 <math>\pm</math> 1.6</b> | <b>1.679e-6</b>  | <b>149.8 %</b>     | <b>0.2351 <math>\pm</math> 0.013</b> | <b>7.114e-7</b>  |

**Abbreviations:** AU, absorbance unit; SEM, standard error of mean; -, toxic concentration. **Statistical significance:** p-values (<0.05, Mann-Whitney *U* test) and corresponding concentrations are shown in bold font.

**Table S2.** Risk factors given by the Cox proportional hazard model for latency to find the platform in the Morris water-maze test. Interaction model between the latency and testing day was constructed to calculate risk factors for finding the platform. A risk factor >1 indicates that that “the risk of finding a submerged platform” was higher in the Clomi-TBI group than in the vehicle-TBI group (*i.e.*, Clomi-TBI animals exhibited improved performance).

|              | <b>Clomi-TBI</b> |
|--------------|------------------|
| <b>Day 1</b> | 0.5088001        |
| <b>Day 2</b> | 0.8252243        |
| <b>Day 3</b> | 1.413685         |

Model was not statistically significant ( $p= 0.5351$ ).  
 Abbreviations: Clomi, clomipramine; TBI, traumatic brain injury.

**Table S3.** Plasma cytokine concentrations in the Vehicle-TBI and Clomi-TBI groups at 7 d, 14 d, and 28 d after TBI. Mean concentration, confidence intervals and p-values are from linear mixed effects model. Cytokine concentration in the Vehicle-TBI and Clomi-TBI groups did not differ at 7 d, 14 d, and 20 d post-TBI (column 7-28 d). Concentrations of plasma cytokines were reduced at 28 d compared with 7 d.

| Cytokine      | 7-28 d                            | 7 d                          |                         | 14 d                         |                         |                      | 28 d                         |                        |                      |
|---------------|-----------------------------------|------------------------------|-------------------------|------------------------------|-------------------------|----------------------|------------------------------|------------------------|----------------------|
|               | Vehicle-TBI vs. Clomi-TBI p-value | Mean [CI lower, upper] pg/ml |                         | Mean [CI lower, upper] pg/ml |                         | 7 d vs. 14 d p-value | Mean [CI lower, upper] pg/ml |                        | 7 d vs. 28 d p-value |
|               |                                   | Vehicle-TBI                  | Clomi-TBI               | Vehicle-TBI                  | Clomi-TBI               |                      | Vehicle-TBI                  | Clomi-TBI              |                      |
| GM-CSF        | 0.2195                            | 62.7 [45.6, 79.7]            | 43.8 [28.7, 58.9]       | 52.4 [37.4, 66.8]            | 56.2 [37.3, 75.2]       | 0.9832               | 18.3 [-0.19, 36.7]           | 38.8 [16.2, 61.5]      | 0.1009               |
| IL-1 $\alpha$ | 0.392                             | 229.9 [119.5, 340.3]         | 215.4 [96.1, 334.1]     | 218.3 [110.2, 326.2]         | 178.02 [68.5, 287.6]    | 0.6497               | 46.2 [-40.6, 132.9]          | 64.2 [-24.5, 152.9]    | <b>&lt;0.0001</b>    |
| IL-1 $\beta$  | 0.476                             | 145.8 [78.0, 213.4]          | 133.2 [62.0, 204.4]     | 149.0 [79.4, 218.5]          | 123.7 [53.3, 194.1]     | 0.9895               | 28.6 [-23.8, 81.0]           | 41.7 [-12.5, 96.0]     | <b>&lt;0.0001</b>    |
| IL-4          | 0.204                             | 140.7 [86.6, 194.8]          | 126.9 [68.2, 185.5]     | 156.3 [97.8, 214.8]          | 124.7 [63.8, 185.5]     | 0.4846               | 21.7 [-13.8, 57.1]           | 65.6 [12.4, 118.8]     | <b>0.00005</b>       |
| IL-5          | 0.5285                            | 670.3 [439.1, 901.4]         | 698.4 [453.1, 943.8]    | 762.5 [528.8, 996.3]         | 661.7 [416.3, 907.1]    | 0.5843               | 290.4 [40.4, 540.3]          | 405.9 [148.8, 663.1]   | <b>&lt;0.0001</b>    |
| IL-6          | 0.3445                            | 1419.9 [837.1, 2002.7]       | 1370.4 [739.5, 2001.2]  | 1633.1 [1021.0, 2245.2]      | 1364 [712.9, 2016.4]    | 0.3775               | 366.9 [-141.0, 874.7]        | 806.3 [156.3, 1456.4]  | <b>0.0024</b>        |
| IL-10         | 0.2418                            | 243.8 [132.3, 355.2]         | 229.3 [109.2, 349.5]    | 241.6 [130.6, 352.7]         | 189.3 [78.3, 300.3]     | 0.7996               | 52.7 [-36.4, 141.6]          | 89.9 [-5.6, 185.3]     | <b>&lt;0.0001</b>    |
| IL-12p70      | 0.5300                            | 818.7 [431.6, 1205.8]        | 717.6 [307.8, 1127.4]   | 893.1 [482.6, 1303.5]        | 689.9 [270.7, 1109.2]   | 0.4894               | 144.5[-131.9, 446.0]         | 204.5 [-91.4, 500.4]   | <b>0.0001</b>        |
| IL-13         | 0.5095                            | 728.0 [512.9, 943.1]         | 680.7 [443.6, 917.7]    | 817.9 [594.1, 1041.7]        | 753.5 [479.4, 1027.6]   | 0.3876               | 230.1 [39.6, 420.6]          | 470.7[180.8, 760.7]    | <b>0.0036</b>        |
| IL-2          | 0.8073                            | 5856.4 [4374.2, 7338.6]      | 5772.5 [4018.7, 7526.3] | 6474.8 [4936.6, 8013.0]      | 5750.6 [3902.0, 7599.3] | 0.6597               | 1574.1 [-522.1, 3670.2]      | 2728.1 [632.5, 4824.7] | <b>0.0002</b>        |
| IFN $\gamma$  | 0.1902                            | 355.0 [204.0, 506.0]         | 316.6 [154.2, 479.1]    | 372.3 [217.7, 527.0]         | 261.2 [113.7, 408.7]    | 0.8536               | 64.0 [-37.1, 165.1]          | 166.3 [19.3, 313.2]    | <b>&lt;0.0001</b>    |
| TNF $\alpha$  | 0.7122                            | 1342 [1020.0, 1664.3]        | 1432.0 [1050.8, 1813.2] | 1505.2 [1170.9, 1839.6]      | 1446.9 [1045.1, 1848.7] | 0.5633               | 393.5 [-62.2, 849.1]         | 746.5 [290.9, 1201.2]  | <b>0.0002</b>        |

**Abbreviations:** CI: 95% confidence interval from linear mixed effects model. **Statistical significance:** Significant p-values (<0.05) of linear mixed effects model are shown in bold font.

**Table S4.** Spearman correlations (Rs values) between cytokines and behavioral tests.

| Cytokine                 | Neuroscore 2 d |           | Neuroscore 7 d |           | Neuroscore 14 d |           | Neuroscore 28 d |           | Beam-walking 2 d |           | Beam-walking 7 d |           | Beam-walking 14 d |           | Beam-walking 28 d |           |
|--------------------------|----------------|-----------|----------------|-----------|-----------------|-----------|-----------------|-----------|------------------|-----------|------------------|-----------|-------------------|-----------|-------------------|-----------|
|                          | Vehicle-TBI    | Clomi-TBI | Vehicle-TBI    | Clomi-TBI | Vehicle-TBI     | Clomi-TBI | Vehicle-TBI     | Clomi-TBI | Vehicle-TBI      | Clomi-TBI | Vehicle-TBI      | Clomi-TBI | Vehicle-TBI       | Clomi-TBI | Vehicle-TBI       | Clomi-TBI |
| <b>Cytokines at 7 d</b>  |                |           |                |           |                 |           |                 |           |                  |           |                  |           |                   |           |                   |           |
| GM-CSF                   | -<br>0.777*    | -0.056    | -0.286         | -0.078    | -0.464          | 0.156     | -0.19           | -0.263    | -0.202           | -0.149    | -0.163           | -0.203*   | -0.144            | 0.147     | -0.069            | 0.138     |
| IL-1 $\alpha$            | -<br>0.675*    | -0.037    | -0.198         | -0.096    | -0.396          | 0.087     | -0.215          | -0.287    | -0.104           | -0.229    | 0.053            | -0.147    | 0.038             | 0.239     | 0.002             | 0.106     |
| IL-1 $\beta$             | -<br>0.688*    | -0.028    | -0.248         | -0.092    | -0.418          | 0.142     | -0.300          | -0.225    | -0.104           | -0.182    | 0.031            | -0.088    | 0.015             | 0.175     | -0.037            | 0.074     |
| IL-4                     | -<br>0.689*    | -0.107    | -0.203         | -0.092    | -0.450          | 0.101     | -0.179          | -0.291    | -0.187           | -0.135    | -0.067           | -0.221    | -0.058            | 0.179     | 0.121             | 0.156     |
| IL-5                     | -<br>0.637*    | -0.149    | -0.279         | -0.183    | -0.437          | 0.325     | -0.347          | -0.263    | -0.091           | -0.28     | 0.064            | -0.065    | 0.024             | 0.290     | -0.095            | 0.120     |
| IL-6                     | -<br>0.559*    | 0.000     | -0.119         | -0.073    | -0.333          | 0.265     | -0.227          | -0.277    | 0.031            | 0.159     | 0.114            | 0.083     | 0.171             | 0.428     | 0.141             | 0.455     |
| IL-10                    | -<br>0.664*    | 0.033     | -0.181         | -0.082    | -0.367          | 0.101     | -0.255          | -0.277    | -0.02            | -0.163    | 0.067            | -0.106    | 0.064             | 0.221     | 0.019             | 0.143     |
| IL-12p70                 | -<br>0.723*    | -0.033    | -0.235         | -0.064    | -0.457          | 0.124     | -0.171          | -0.244    | -0.149           | -0.14     | -0.089           | -0.134    | -0.064            | 0.175     | -0.113            | 0.115     |
| IL-13                    | -<br>0.530*    | -0.014    | -0.036         | -0.105    | -0.307          | 0.256     | -0.118          | -0.348    | 0.049            | 0.201     | 0.126            | 0.152     | 0.222             | 0.414     | 0.290             | 0.469     |
| IL-2                     | -<br>0.611*    | 0.093     | -0.120         | -0.055    | -0.422          | 0.284     | -0.157          | -0.263    | -0.115           | 0.023     | -0.002           | -0.032    | 0.076             | 0.147     | 0.171             | 0.271     |
| IFN $\gamma$             | -<br>0.594*    | 0.000     | -0.023         | -0.151    | -0.228          | 0.229     | -0.141          | -0.380    | 0.089            | 0.079     | 0.087            | 0.069     | 0.169             | 0.345     | 0.124             | 0.391     |
| TNF $\alpha$             | -<br>0.664*    | -0.079    | -0.176         | -0.142    | -0.363          | 0.142     | -0.233          | -0.362    | -0.02            | -0.093    | 0.078            | -0.152    | 0.071             | 0.198     | -0.017            | 0.221     |
| <b>Cytokines at 14 d</b> |                |           |                |           |                 |           |                 |           |                  |           |                  |           |                   |           |                   |           |
| GM-CSF                   | 0.016          | 0.362     | 0.168          | 0.762*    | 0.218           | 0.337     | -0.044          | 0.488     | 0.291            | 0.786     | 0.244            | 0.712*    | 0.429             | 0.441     | 0.163             | 0.483     |
| IL-1 $\alpha$            | 0.132          | 0.289     | 0.232          | 0.746*    | 0.244           | 0.471     | -0.038          | 0.484     | 0.328            | 0.751     | 0.318            | 0.668*    | 0.476             | 0.418     | 0.200             | 0.497     |
| IL-1 $\beta$             | 0.091          | 0.312     | 0.206          | 0.728*    | 0.244           | 0.421     | -0.042          | 0.432     | 0.319            | 0.76      | 0.278            | 0.765*    | 0.443             | 0.395     | 0.195             | 0.460     |
| IL-4                     | 0.070          | 0.383     | 0.21           | 0.745*    | 0.270           | 0.420     | -0.035          | 0.412     | 0.337            | 0.888     | 0.218            | 0.686*    | 0.394             | 0.408     | 0.145             | 0.551     |
| IL-5                     | 0.077          | 0.177     | 0.147          | 0.668*    | 0.223           | 0.485     | -0.046          | 0.395     | 0.271            | 0.662     | 0.296            | 0.654*    | 0.478             | 0.474     | 0.162             | 0.487     |
| IL-6                     | 0.138          | 0.229     | 0.166          | 0.677*    | 0.273           | 0.411     | -0.106          | 0.374     | 0.304            | 0.827     | 0.346            | 0.764*    | 0.467             | 0.468     | 0.139             | 0.541     |
| IL-10                    | 0.088          | 0.247     | 0.221          | 0.682*    | 0.235           | 0.499     | -0.032          | 0.404     | 0.337            | 0.728     | 0.307            | 0.696*    | 0.477             | 0.455     | 0.204             | 0.524     |
| IL-12p70                 | 0.068          | 0.323     | 0.220          | 0.773*    | 0.227           | 0.415     | 0.010           | 0.501     | 0.341            | 0.804     | 0.249            | 0.686*    | 0.445             | 0.436     | 0.199             | 0.509     |
| IL-13                    | 0.134          | 0.428     | 0.199          | 0.637*    | 0.264           | 0.189     | -0.091          | 0.275     | 0.315            | 0.880     | 0.386            | 0.730*    | 0.487             | 0.594*    | 0.238             | 0.677*    |
| IL-2                     | 0.111          | 0.514     | 0.195          | 0.755*    | 0.253           | 0.392     | -0.104          | 0.407     | 0.273            | 0.893     | 0.256            | 0.760*    | 0.376             | 0.454*    | 0.212             | 0.620*    |

|                                                                   |       |       |        |        |        |        |        |       |        |       |        |        |       |        |       |       |
|-------------------------------------------------------------------|-------|-------|--------|--------|--------|--------|--------|-------|--------|-------|--------|--------|-------|--------|-------|-------|
| IFN $\gamma$                                                      | 0.014 | 0.378 | 0.113  | 0.773* | 0.159  | 0.307  | -0.173 | 0.334 | 0.240  | 0.886 | 0.251  | 0.705* | 0.363 | 0.533* | 0.148 | 0.658 |
| TNF $\alpha$                                                      | 0.059 | 0.323 | 0.156  | 0.755* | 0.216  | 0.438  | -0.091 | 0.483 | 0.277  | 0.837 | 0.244  | 0.755* | 0.403 | 0.399  | 0.160 | 0.495 |
| <b>Cytokines at 28 d</b>                                          |       |       |        |        |        |        |        |       |        |       |        |        |       |        |       |       |
| GM-CSF                                                            | 0.115 | 0.438 | -0.339 | 0.297  | -0.298 | 0.514  | -0.361 | 0.326 | -0.226 | 0.189 | 0.387  | 0.438  | 0.231 | -0.133 | 0.037 | 0.027 |
| IL-1 $\alpha$                                                     | 0.000 | 0.212 | -0.117 | 0.330  | -0.321 | 0.686* | -0.267 | 0.216 | -0.171 | 0.456 | 0.350  | 0.627* | 0.203 | -0.026 | 0.240 | 0.256 |
| IL-1 $\beta$                                                      | 0.188 | 0.042 | 0.003  | 0.383  | -0.099 | 0.619* | -0.034 | 0.247 | -0.025 | 0.395 | 0.521  | 0.558  | 0.396 | -0.241 | 0.140 | 0.032 |
| IL-4                                                              | 0.165 | 0.269 | 0.002  | 0.384  | -0.174 | 0.542  | -0.079 | 0.261 | 0.023  | 0.479 | 0.559* | 0.735* | 0.398 | 0.029  | 0.243 | 0.198 |
| IL-5                                                              | 0.164 | 0.235 | -0.024 | 0.314  | -0.089 | 0.688* | -0.119 | 0.209 | -0.039 | 0.409 | 0.507  | 0.600  | 0.389 | -0.07  | 0.121 | 0.218 |
| IL-6                                                              | 0.225 | 0.269 | -0.127 | 0.384  | -0.048 | 0.542  | -0.334 | 0.261 | -0.073 | 0.479 | 0.417  | 0.735  | 0.308 | 0.029  | 0.088 | 0.198 |
| IL-10                                                             | 0.238 | 0.272 | 0.052  | 0.330  | -0.022 | 0.499  | -0.078 | 0.132 | 0.044  | 0.396 | 0.567* | 0.698* | 0.440 | 0.009  | 0.174 | 0.198 |
| IL-12p70                                                          | 0.169 | 0.188 | 0.066  | 0.314  | -0.126 | 0.600  | -0.012 | 0.128 | 0.029  | 0.400 | 0.537  | 0.656* | 0.406 | -0.056 | 0.376 | 0.195 |
| IL-13                                                             | 0.141 | 0.239 | -0.131 | 0.462  | -0.214 | 0.444  | -0.253 | 0.346 | -0.059 | 0.425 | 0.444  | 0.626* | 0.320 | -0.118 | 0.180 | 0.043 |
| IL-2                                                              | 0.185 | 0.200 | -0.086 | 0.382  | -0.166 | 0.429  | -0.227 | 0.185 | -0.024 | 0.387 | 0.470  | 0.698* | 0.340 | -0.080 | 0.198 | 0.066 |
| IFN $\gamma$                                                      | 0.054 | 0.269 | -0.130 | 0.384  | -0.255 | 0.542  | -0.281 | 0.261 | -0.148 | 0.479 | 0.443  | 0.735* | 0.266 | 0.029  | 0.222 | 0.198 |
| TNF $\alpha$                                                      | 0.207 | 0.301 | -0.119 | 0.281  | -0.014 | 0.454  | -0.175 | 0.269 | -0.144 | 0.430 | 0.454  | 0.705* | 0.304 | -0.068 | 0.011 | 0.111 |
| <b>Statistical significance:</b> Significant Rs values: *, <0.05. |       |       |        |        |        |        |        |       |        |       |        |        |       |        |       |       |

| <b>Table S5.</b> Feature sets used in machine learning analysis. |                                                                                                                                                                     |
|------------------------------------------------------------------|---------------------------------------------------------------------------------------------------------------------------------------------------------------------|
| <b>Feature set</b>                                               | <b>Variables</b>                                                                                                                                                    |
| Weight                                                           | Body weight measured at baseline, on the day of TBI induction, and at 1-7 d, 9 d, 11 d, 14 d, and 17 d after TBI                                                    |
| Temperature                                                      | Temperature measured at baseline and at 1-7 d, 9 d, 11 d, 14 d, and 17 d after TBI                                                                                  |
| Neuroscore                                                       | Total neuroscore at 2 d, 7 d, 14 d, and 28 d after TBI                                                                                                              |
| Beamwalk                                                         | Beamwalk score at 2 d, 7 d, 14 d, and 28 d after TBI                                                                                                                |
| MWM                                                              | Probe latencies at days 3 and 5                                                                                                                                     |
| Cytokines                                                        | Cytokines (IL-1 $\alpha$ , IL-1 $\beta$ , IL-2, IL-4, IL-5, IL-6, IL-10, IL-12 p70, IL-13, GM-CSF, INF $\gamma$ and TNF $\alpha$ ) at 7 d, 14 d, and 28 d after TBI |
| TBI                                                              | Duration of apnea, duration of post-impact seizure-like behavior, and impact pressure                                                                               |

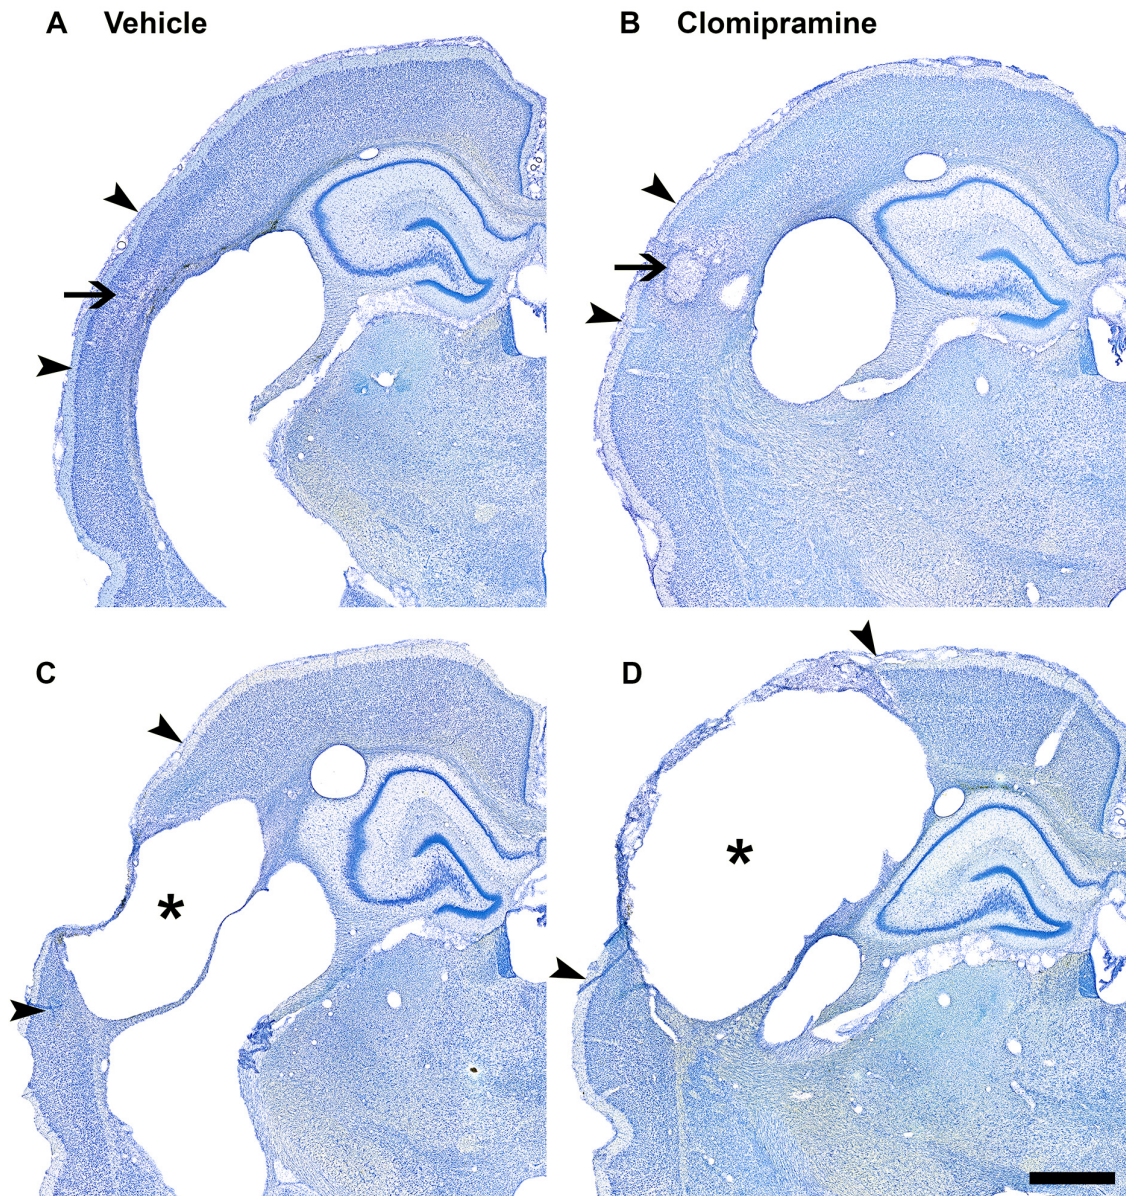

**Figure S1.** Thionin-stained coronal brain sections of the vehicle (panels A, C) and clomipramine –treated (panels B, D) rats at 28 days post-TBI, showing a comparable range of lesion severities. **(A)** A vehicle treated rat with a small cortical lesion. **(B)** A clomipramine-treated rat with small cortical lesion. **(C)** A vehicle treated rat with large cortical lesion. **(D)** A clomipramine-treated rat with a large cortical lesion. Arrowheads in panels A-D indicate the dorsoventral extent of the cortical lesion. Black arrows in panels A and B indicate the epicenter of the cortical lesion in A and B. Stars in C and D indicate the lesion cavity. Scale bar equals 1 mm (all panels).
